# Supplementary material for: Novel Biogenic Synthesis of a Ag@Biochar Nanocomposite as an Antimicrobial Agent and Photocatalyst for Methylene Blue Degradation
Source: PubMed Central journal article supplement — ACS Omega. 2022 Feb 21;7(9):8046–59. doi: 10.1021/acsomega.1c07209 (PMC8908515; doi:10.1021/acsomega.1c07209), 2022-02-21
Supplement: ao1c07209_si_001.pdf [file ao1c07209_si_001.pdf]

## Supplementary data

### **A novel biogenic synthesis of Ag@biochar nanocomposite as antimicrobial agent and photocatalyst for methylene blue degradation**

Abdelazeem S. Eltaweil<sup>1\*</sup>, Ahmed M. Abdelfatah<sup>2</sup>, Mohamed Hosny<sup>2\*</sup>, and Manal Fawzy<sup>2,3</sup>

<sup>1</sup> Department of Chemistry, Faculty of Science, Alexandria University, Alexandria, 21321, Egypt.

<sup>2</sup> Green Technology Group, Environmental Sciences Department, Faculty of Science, Alexandria University, 21511, Alexandria, Egypt.

<sup>3</sup> National Egyptian Biotechnology Experts Network, National Egyptian Academy for Scientific Research and Technology.

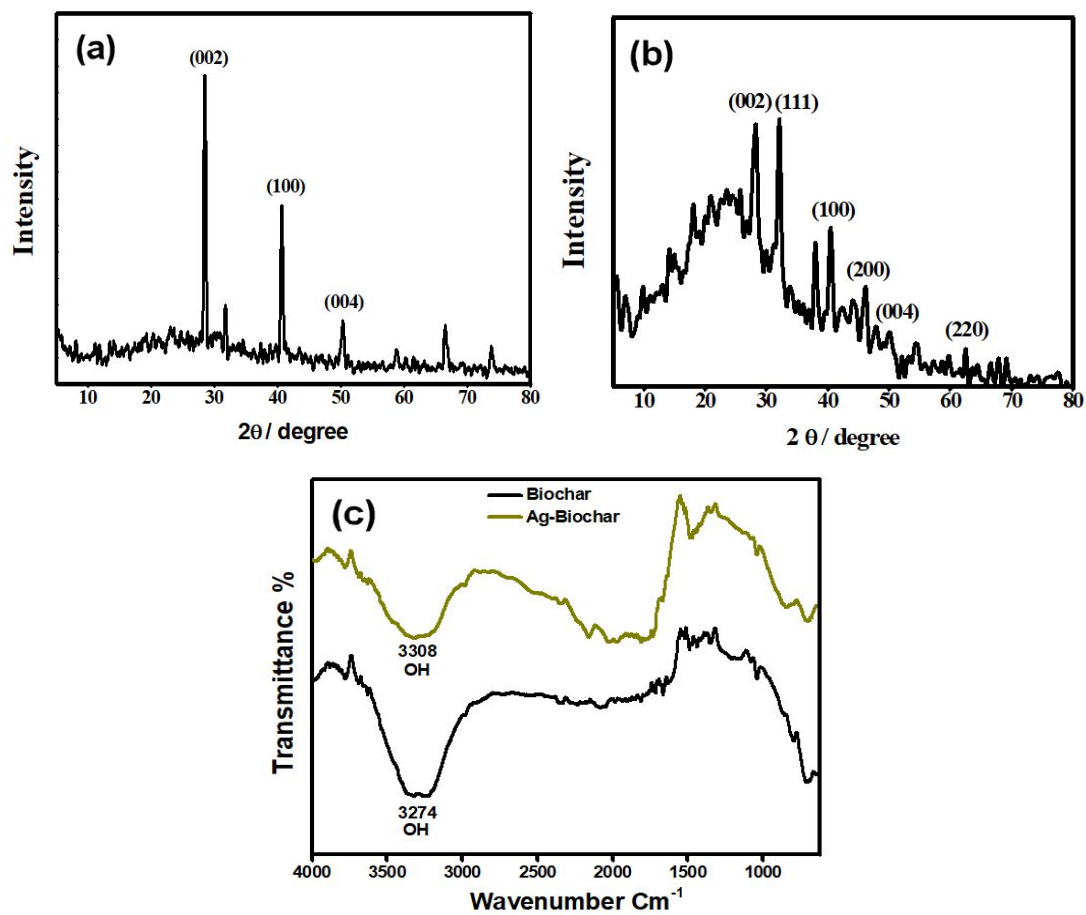

**Figure S1.** XRD diffraction pattern of biochar (a) and Ag@biochar (b) and FTIR spectroscopy of biochar and Ag@biochar (c).

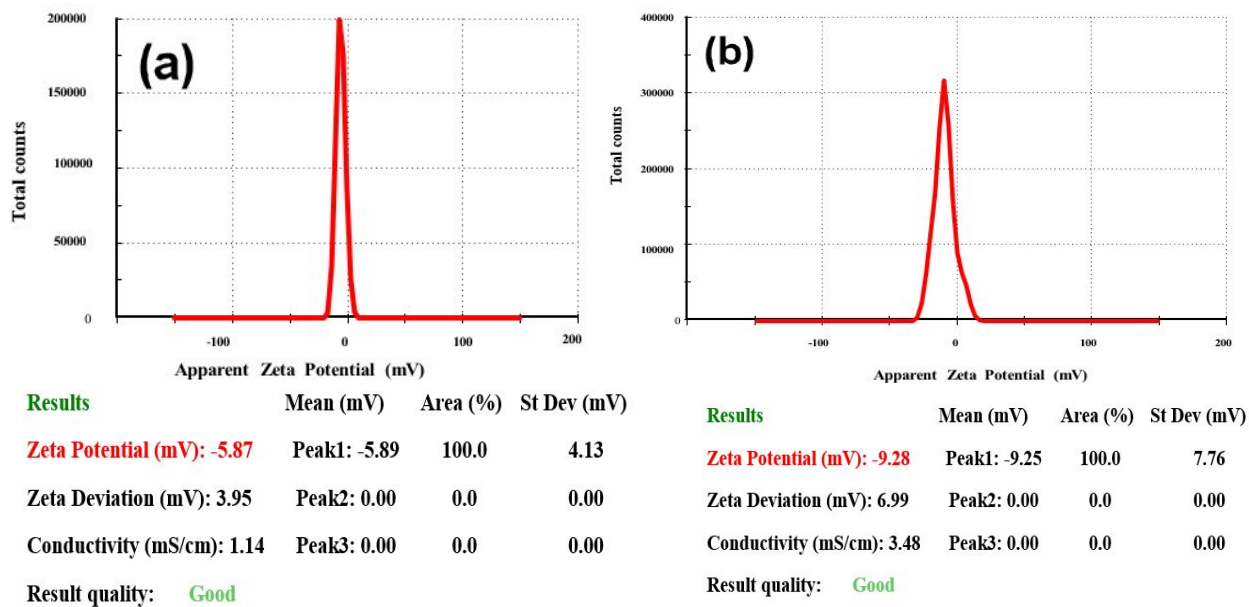

Figure S2. Zeta potential of (a) Ag@biochar and (b) biochar.

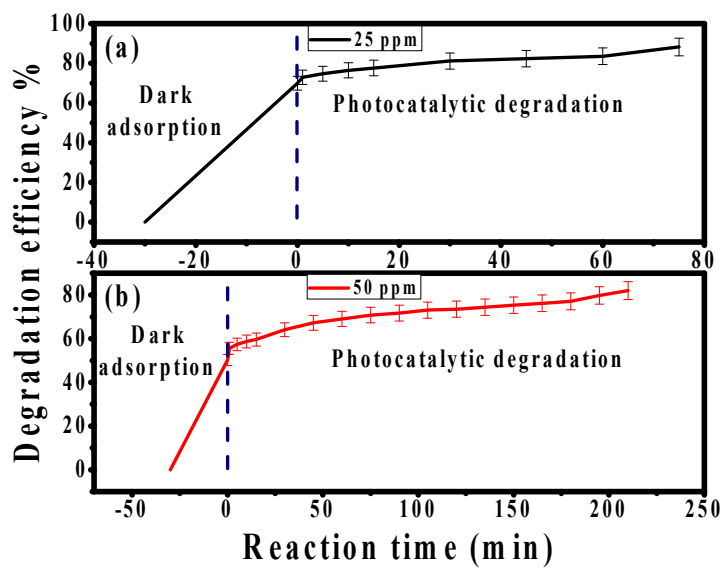

Figure S3. Time effect on the degradation of MB at concentration 25 ppm (a) and 50 ppm (b) in the presence of Ag@biochar.

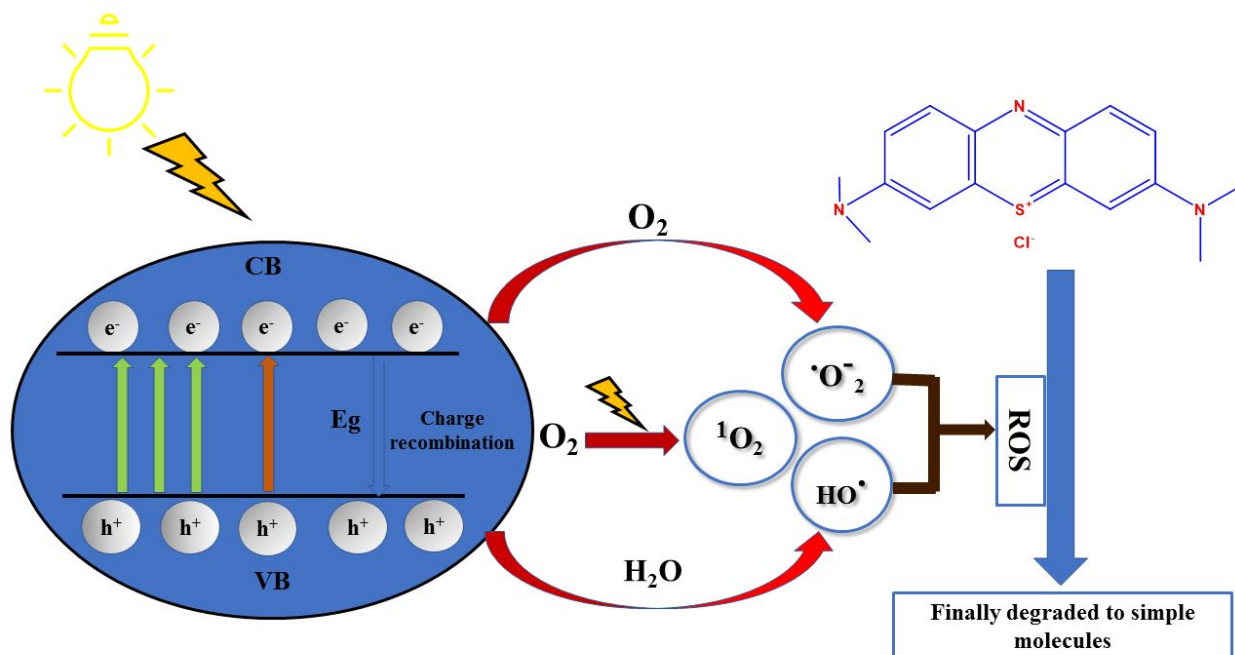

**Figure S4.** Possible mechanism of MB photodegradation using Ag@biochar.
